# Supplementary material for: Antioxidant Effect of a Polyphenol-Rich Murtilla (Ugni molinaeTurcz.) Extract and Its Effect on the Regulation of Metabolism in Refrigerated Boar Sperm
Source: Hindawi journal article supplement (doi:10.1155/2019/2917513), 2019-06-03
Supplement: f1 [file 2917513.f1.pdf]

## Supplementary Materials

Supplementary 1: Composition of sperm TALP-HEPES and modification of the composition for each treatment. Basal TALP-HEPES maintains the basal condition of sperm samples without generating any physiological modification to induce capacitation. CAP.BUFFER includes 2.0mM of CaCl<sub>2</sub> for activating capacitation by the calcium pathway. MT corresponds to TALP-HEPES and 10 µgGAE mL<sup>-1</sup> of MT-Ex. MT + CAP.BUFFER contains the same characteristic of capacitating buffer but includes 10µgGAE mL<sup>-1</sup> of extract to evaluate the calcium response in sperm samples.

| <b>Reagent</b>                          | <b>BASAL:<br/>TALP-<br/>HEPES<br/>medium</b> | <b>CAP. BUFFER:<br/>TALP-HEPES +<br/>Calcium and<br/>BSA</b> | <b>MT +<br/>CAP.BUFFER:<br/>TALP-HEPES +<br/>Calcium, BSA and<br/>MT-Ex</b> | <b>MT:<br/>TALP-HEPES<br/>medium + MT-Ex</b> |
|-----------------------------------------|----------------------------------------------|--------------------------------------------------------------|-----------------------------------------------------------------------------|----------------------------------------------|
| <b>Glucose</b>                          | 6 mM                                         | 5mM                                                          | 5mM                                                                         | 6 mM                                         |
| <b>NaCl</b>                             | 113 mM                                       | 100mM                                                        | 100mM                                                                       | 113 mM                                       |
| <b>KCl</b>                              | 2.7 mM                                       | 3.1mM                                                        | 3.1mM                                                                       | 2.7 mM                                       |
| <b>CaCl<sub>2</sub></b>                 | -                                            | 2.0mM                                                        | 2.0mM                                                                       | -                                            |
| <b>MgCl<sub>2</sub></b>                 | 0.5 mM                                       | 0.4mM                                                        | 0.4mM                                                                       | 0.5 mM                                       |
| <b>NaH<sub>2</sub>PO<sub>4</sub></b>    | 0.4 mM                                       | 0.3mM                                                        | 0.3mM                                                                       | 0.4 mM                                       |
| <b>NaHCO<sub>3</sub></b>                | 20 mM                                        | 15mM                                                         | 15mM                                                                        | 20 mM                                        |
| <b>Pyruvate</b>                         | 3,1 mM                                       | 1.0mM                                                        | 1.0mM                                                                       | 3,1 mM                                       |
| <b>Lactate</b>                          | 20 mM                                        | 21.7mM                                                       | 21.7mM                                                                      | 20 mM                                        |
| <b>HEPES</b>                            | 20 mM                                        | 20mM                                                         | 20mM                                                                        | 20 mM                                        |
| <b>BSA</b>                              | -                                            | 0.3% (wt/vol)                                                | 0.3% (wt/vol)                                                               | -                                            |
| <b>mosm/kg</b>                          | 290-300                                      | 290-300                                                      | 290-300                                                                     | 290-300                                      |
| <b>pH</b>                               | 7.4                                          | 7.4                                                          | 7.4                                                                         | 7.4                                          |
| <b>Murtilla<br/>Extract<br/>(MT-Ex)</b> |                                              |                                                              | 0.315µgGAE mL <sup>-1</sup>                                                 | 0.315µgGAE mL <sup>-1</sup>                  |
